# Supplementary material for: Leptin Improves Parameters of Brown Adipose Tissue Thermogenesis in Lipodystrophic Mice
Source: MDPI journal article supplement (doi:10.3390/nu13082499), 2021-07-22
Supplement: s1 [file s1]

(a)

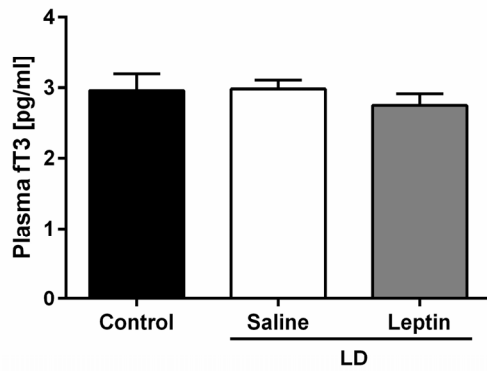

(b)

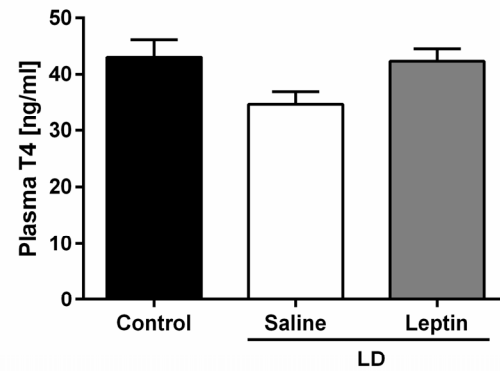

**Supplementary Figure S1.** Effects of chronic leptin treatment on circulating thyroid hormones in LD mice. Circulating (a) free triiodothyronine (fT3) and (b) thyroxine (T4) determined by ELISA of control mice, saline-treated LD mice, and 3.0 mg/kg BW/day leptin-treated mice. Data are presented as mean  $\pm$  SEM and represent N = 8 per group.

| <b>Gene</b>  | <b>Forward sequence</b> | <b>Reverse sequence</b> |
|--------------|-------------------------|-------------------------|
| <i>36b4</i>  | AAGCGCGTCCTGGCATTGTCT   | CCGCAGGGGCAGCAGTGGT     |
| <i>Cidea</i> | GCCGTGTTAAGGAATCTGCTG   | TGCTCTTCTGTATCGCCCAGT   |
| <i>Dio2</i>  | CAGTGTGGTGCACGTCTCCAATC | TGAACCAAAGTTGACCACCAG   |
| <i>Pgc1a</i> | CTTTTGTGGACGGAAGCAAT    | GAGTCTTGGGAAAGGACACG    |
| <i>Nrg4</i>  | CGACGAGAGAAGCCCATCAT    | TCCAGGCCAGTGATGACAGTA   |
| <i>Ucp1</i>  | TCTGCATGGGATCAAACCCC    | ACAGTAAATGGCAGGGGACG    |

**Supplemental Table S1.** Primer sequences 5'-3' used for quantitative real-time RT-PCR analysis.
